# Supplementary material for: Efficacy and Safety of Berberine Alone for Several Metabolic Disorders: A Systematic Review and Meta-Analysis of Randomized Clinical Trials
Source: Front Pharmacol. 2021 Apr 26;12:653887. doi: 10.3389/fphar.2021.653887 (PMC8107691; doi:10.3389/fphar.2021.653887)
Supplement: Supplementary file 3 [file Table1.XLSX]

## Sheet: Sheet1
Author	Journal (year)	Study Design	CONTROL		TRIAL		Disease	Berberine Dose	Duration	Data Selected	Country
			N	Age	N	Age
WANG Li (14)	Chinese Journal of Integrated Traditional and Western Medicine (2016)	placebo-controlled	45		44		Hypercholesterolemic	0.3g tid	3-month	TG TC LDL HDL FPG	China
Weijia Kong (22)	NATURE MEDICINE (2004)	placebo-controlled	11		32		Hypercholesterolemic	0.5g bid	3-month	TG TC LDL HDL	China
Giuseppe Derosa (15)	Expert Opinion on Biological Therapy (2013)	placebo-controlled	69	54±12	68	53±11	Hypercholesterolemia	0.5g bid	3-month	TG TC LDL HDL FPG	Italy
Marzie Zilaee (23)	Phytotherapy Research (2014)	placebo-controlled	53	40.89±9.61	53	38.96±9.04	Metabolic syndrome	0.6g qd	6-week	TG TC LDL HDL	Iran
Karina G. Pe´rez-Rubio (24)	Metabolic Syndrome & Related Disorders (2013)	placebo-controlled	12		12		Metabolic syndrome	0.5g tid	3-month	TG FPG	Mexico
Yifei Zhang (25)	J Clin Endocrinol Metab (2008)	placebo-controlled	52		58	51±9	T2DM and Dyslipidemia	0.5g bid	3-month	TG TC LDL HDL HOMA-IR FPG	China
Yan Gu (26)	Talanta (2010)	placebo-controlled	30	50±10	30	51±9	T2DM and Dyslipidemia	1.0g tid	3-month	TG TC LDL HDL HOMA-IR FPG	China
Yuan An (27)	Clinical Endocrinology (2013)	placebo-controlled	43	28.4±4.0	44	28.2±3.8	PCOS	0.5g tid	3-month	TG TC LDL HOMA-IR FPG	China
Naheed Aryaeian (28)	Complementary Therapies in Medicine (2020)	placebo-controlled	31	47.1±10.75	31	48.61±11.69	Rheumatoid Arthritis，T2DM, Dyslipidemia and Obesity	0.5g tid	3-month	TG TC LDL HDL FPG	Iran
Jie-mei Wang (29)	European Journal of Pharmacology (2009)	parallel-controlled	11	52.72±4.37	14	54.07±5.57	Healthy	0.4g tid	1-month	TG TC LDL HDL FPG	China
Jianqiang Zhao (30)	Journal of Practical Diabetology (2018)	parallel-controlled	32	54.7±0.80	32	54.9±0.16	IGR	0.3-0.5g tid	3-month	TG TC FPG	China
Zhanjie Zhang (31)	Zhejiang Journal of Traditional Chinese Medicine (2018)	parallel-controlled	50	52.2±6.12	50	49.4±5.03	IGR	0.3g tid	4-month	TG TC LDL FPG	China
Shaobin Ju (32)	Journal of Practical Traditional Chinese Medicine (2007)	parallel-controlled	44	45.6±4.4	46	46.7±4.2	IGR，Hypercholesterolemia	0.2g tid	1-year	TG TC LDL HDL HOMA-IR FPG	China
Yanfang Zhou (33)	Chinese Journal of Clinical Rational Drug Use (2011)	parallel-controlled	60	58±7	60	56±8	Hypercholesterolemia	0.3g tid	4-month	TG TC LDL HDL	China
Hong-Mei Yan (34)	PLOS ONE (2015)	parallel-controlled	62	50.64±10.69	62	50.72±9.76	NAFLD IGR T2DM	0.5g tid	16-week	TG TC LDL HDL HOMA-IR FPG	China
Xinxia Chang (35)	Journal of Translational Medicine (2016)	parallel-controlled	39	50.8±10.4	41	51.2±9.4	NAFLD IGR T2DM	0.5g tid	16-week	TG TC LDL HDL FPG	China
Ruimiao Bai (36)	Pract Geriatrics (2011)	parallel-controlled	30	56.6±16.5	38	56.1±12.0	NAFLD	0.5g tid	3-month	TG TC LDL HOMA-IR FPG	China
Ying Cao (37)	China national knowledge infrastructure (2007)	parallel-controlled	30	55.4±10.7	30	55.3±11.5	T2DM	0.5g tid	3-month	TG TC LDL HDL FPG	China
